# Supplementary material for: Crystal phase-dependent electrocatalytic hydrogen evolution performance of ruthenium–boron intermetallics
Source: Royal Society of Chemistry journal article supplement (doi:10.1039/d0cc00070a), 2020-01-01
Supplement: d0cc00070a1.pdf [file d0cc00070a1.pdf]

*Electronic Supplementary Information for*

**Crystal Phase-Dependent Electrocatalytic Hydrogen Evolution  
Performance of Ruthenium-Boron Intermetallics**

Xu Zou,<sup>‡</sup> Lina Wang,<sup>‡</sup> Xuan Ai, Hui Chen, and Xiaoxin Zou\*

*State Key Laboratory of Inorganic Synthesis and Preparative Chemistry, College of Chemistry, Jilin  
University, Changchun 130012, P. R. China;*

*<sup>‡</sup> X. Zou and L. Wang contributed equally to this work.*

\* E-mail: xxzou@jlu.edu.cn

# 1. Theoretical Section

## 1.1. Computation Details.

The calculations for all the materials were carried out by the *Vienna ab initio simulation package* (VASP)<sup>[1-2]</sup> based on the density functional theory (DFT). Perdew-Burke-Ernzerhof (PBE)<sup>[3]</sup> exchange-correlation functional within the generalized gradient approximation (GGA) was used for the structural relaxations and electronic structure calculations. The cutoff energy of plane-wave set<sup>[4]</sup> is 400 eV. While the convergence thresholds of atomic force and total energy were set as 0.02 eV/Å and 10<sup>-4</sup> eV, respectively. The appropriate Monkhorst-Pack *k*-point meshes 7×7×7, 11×11×7, 5×5×5, 9×9×9, 11×11×3, 9×9×9, 11×11×9 and 11×11×4 were chosen for the bulk calculations of Pt, Ru, Ru<sub>7</sub>B<sub>3</sub>, RuB, Ru<sub>2</sub>B<sub>3</sub>, RuB<sub>2</sub>-I, RuB<sub>2</sub>-II and RuB<sub>2</sub>-III. In regard to the slab models of surfaces, 5×5×1 *k*-point mesh was employed for all of them<sup>[5]</sup>. The symmetrization was switched off and the dipolar correction was included for all the calculations of slab models. The DFT-D2 method<sup>[6]</sup> was used to correct the *van der Waals* interaction. The crystal orbital Hamiltonian population (COHP) was obtained by LOBSTER code<sup>[7-10]</sup>.

For the slab models, we constructed 1×1 supercell for Ru<sub>7</sub>B<sub>3</sub> and 2×2 supercells for other ruthenium-boron intermetallics by cleaving the bulk structure with metal-termination along the (001) direction, where a vacuum layer of 15 Å between slabs was added to avoid inter-layer interactions. The thickness of Ru (0001) and Pt (111) slab models were four atomic layers and the others were eight atomic layers. During the slab calculations, we relaxed the upper half of atom layers and the remaining were kept frozen.

## 1.2. Computations of Formation Energy for Ruthenium-Boron Intermetallics.

The formation energy was calculated by the equation:  $\Delta H_f = [E_{\text{total}}(\text{Ru}_x\text{B}_y) - xE_{\text{total}}(\text{Ru}) - yE_{\text{total}}(\text{B})]/(x+y)$ , where  $E_{\text{total}}(\text{Ru}_x\text{B}_y)$  is the total energy for one formula unit of the compound,  $E_{\text{total}}(\text{Ru})$  and  $E_{\text{total}}(\text{B})$  are the energies of pure metal Ru and  $\alpha$ -B at the ground state, and  $x$  and  $y$  are the number of Ru and B atoms, respectively.

## 1.3. Computations of Free-Energy for the Hydrogen Evolution Reaction.

The Gibbs free-energy ( $\Delta G_{\text{H}^*}$ ) of H<sup>\*</sup> adsorption was obtained by the equation  $\Delta G_{\text{H}^*} = \Delta E_{\text{H}^*} + \Delta \text{ZPE} - T\Delta S$ , where  $\Delta E_{\text{H}^*}$ ,  $\Delta \text{ZPE}$  and  $\Delta S$  are the adsorption energy, zero point energy and entropy change<sup>[11]</sup>.  $\Delta E_{\text{H}^*}$  is defined as  $\Delta E_{\text{H}^*} = E(\text{surface} + n\text{H}) - E[\text{surface} + (n-1)\text{H}] - 1/2 E(\text{H}_2)$ , where  $E(\text{surface} + n\text{H})$ ,  $E[\text{surface} + (n-1)\text{H}]$  and  $E(\text{H}_2)$  are energies of  $n$ ,  $n-1$  hydrogen atom adsorbed on the surface, and a gas phase H<sub>2</sub> molecule.  $\Delta \text{ZPE}$  was calculated by using the equation  $\Delta \text{ZPE} = \text{ZPE}(\text{H}^*) - 1/2 \text{ZPE}(\text{H}_2)$ ,  $T\Delta S$  was obtained by using the equation  $T\Delta S \approx -1/2 TS(\text{H}_2)$ . Since  $TS(\text{H}_2)$  is 0.41eV for H<sub>2</sub> at 298K and 1atm,  $T\Delta S \approx -0.205$  eV.

# 2. Experimental Section

## 2.1. Chemicals and Reagents.

Potassium aquapentachlororuthenate(III) (K<sub>2</sub>RuCl<sub>5</sub>) and platinum tetrachloride (PtCl<sub>4</sub>, 99.9%) were purchased from Aladdin Chemistry Co., Ltd. Magnesium boride (MgB<sub>2</sub>) was purchased from Alfa Aesar Chemicals Co., Ltd. Magnesium powder (Mg) was purchased from Shantou Xilong Chemical Factory.

Sulfuric acid (H<sub>2</sub>SO<sub>4</sub>), potassium hydroxide (KOH) and isopropanol were purchased from Beijing Chemical Factory. Platinum on graphitized carbon (20 wt% Pt/C) and Nafion® perfluorinated resin solution were purchased from Sigma-Aldrich. Highly purified water (> 18 MΩ cm resistivity) was obtained from a PALL PURELAB Plus system.

## 2.2. Synthesis of Ruthenium-Boron Intermetallics.

Four ruthenium-boron intermetallics with different crystal phases by solid phase synthesis. First, a certain amount of potassium aquapentachlororuthenate(III) (K<sub>2</sub>RuCl<sub>5</sub>), magnesium diboride (MgB<sub>2</sub>) and magnesium powder (Mg) were ground and then loaded into a quartz tube, which was then sealed in a vacuum atmosphere (1.0 Pa). The exceptions are the synthesis of Ru<sub>2</sub>B<sub>3</sub> and RuB<sub>2</sub>, which does not require to add Mg. To avoid the effects of moisture, weighting all chemicals were under infrared light. Next, put the quartz tube into the tubular furnace for heating with a speed of 2 °C/min. The heating temperature was 700-950 °C, maintaining some time in the temperature (generally 3-10 hours). After cooling to room temperature, the product was immersed in 0.5 M H<sub>2</sub>SO<sub>4</sub> solution for 3 hours to remove unreacted reactants (*i.e.*, Mg powder) and by-product (*i.e.*, MgCl<sub>2</sub>). Finally, the sample was washed three times with distilled water and ethanol, respectively, and then dried at 80 °C. The detailed synthesis parameters were shown in Table S3. RuB<sub>2</sub> was synthesized according to our previously-reported procedure<sup>[12]</sup>.

## 2.3. Synthesis of Ru nanoparticles:

K<sub>2</sub>RuCl<sub>5</sub> (51.9 mg, 0.25 mmol) and Mg (14.6 mg, 0.6 mmol) were ground and loaded into a quartz tube, which was then sealed in a vacuum atmosphere (1.0 Pa). The quartz tube was heated in a tubular furnace for 4 h at 700 °C, and the heating rate was 2 °C/min. After cooling, the sample was immersed in 0.5 M H<sub>2</sub>SO<sub>4</sub> solution for 3 hours. Finally, the sample was washed three times with distilled water and ethanol, respectively, and then dried at 80 °C.

## 2.4. Synthesis of Pt nanoparticles:

PtCl<sub>4</sub> (84.2 mg, 0.25 mmol) and Mg (24.3 mg, 1.0 mmol) were ground and loaded into a quartz tube, which was then sealed in a vacuum atmosphere (1.0 Pa). The quartz tube was heated in a tubular furnace for 4 h at 500 °C, and the heating rate was 2 °C/min. After cooling, the sample was immersed in 0.5 M H<sub>2</sub>SO<sub>4</sub> solution for 3 hours. Finally, the sample was washed three times with distilled water and ethanol, respectively, and then dried at 80 °C.

## 2.5. Characterizations.

Powder X-ray diffraction (PXRD) of ruthenium-boron intermetallics were recorded on a Rigaku D/Max 2550 X-ray diffractometer. The range of diffraction angle was 10-80°, and the scan speed was 8 °/min. The transmission electron microscope (TEM) images were achieved with a Philips-FEI Tecnai G2STwin microscope equipped with a field emission gun operating at 200 kV. The specific surface area of ruthenium-boron intermetallics were obtained using the Brunauer-Emmett-Teller (BET) method on a Micromeritics ASAP 2020 M system.

## 2.6. Electrochemical Measurements.

The electrochemical measurements were researched with a three-electrode system using a CH Instrument (Model 660E). Saturated calomel electrode (SCE) and Hg/HgO electrode were used as

reference electrodes in acid (0.5 M H<sub>2</sub>SO<sub>4</sub> solution) and alkaline (1.0 M KOH solution) systems, respectively. Carbon rod was used as the counter electrode. To prepare the working electrode: (1) 8 mg of sample was dispersed into 400 μL of isopropanol and 400 μL of conductive polymer binder (0.3% Nafion solution); (2) 2 μL of this solution was dropped onto a glassy carbon electrode (GCE) with a diameter of 3mm and dried in the air; (3) 2 μL of conductive polymer binder was dropped on top and dried to be used as working electrode. The loading mass is 0.281 mg cm<sup>-2</sup>. During the test, N<sub>2</sub> was continuously introduced into the electrochemical cell. Linear sweep voltammetry (LSV) measurements were used with the scan rate of 0.5 mV/s and 85% *iR*-correction. We used chronopotentiometric measurements to evaluate the stability of the material at current density of 10 mA cm<sup>-2</sup> without *iR*-correction. Convert the potential to the potential *versus* the reversible hydrogen electrode (RHE) according to formula (1) in acid condition and formula (2) in alkaline condition:

$$E_{vs\ RHE} = E_{vs\ SCE} + E^{\circ}_{SCE} + 0.059pH \quad (1)$$

$$E_{vs\ RHE} = E_{vs\ Hg/HgO} + E^{\circ}_{Hg/HgO} + 0.059pH \quad (2)$$

Reference electrodes were calibrated according to the method reported by Boetter and co-workers<sup>[13]</sup>. For comparison, the catalytic activities of Ru, Pt and commercial 20 wt.% Pt/C were evaluated under the same test conditions and loading.

The  $j_{BET}$  value was normalized with the Brunauer-Emmett-Teller (BET) surface area from formula (3):

$$j_{BET} = \frac{i \times 100}{S \times m_{loading} \times A_{(BET)}} \quad (3)$$

where *i* is the current obtained with 85% *iR*- correction; *S* is the geometric area of GCE (0.071 cm<sup>2</sup>); *m*<sub>loading</sub> is the loading mass of sample on the GCE (0.281 mg cm<sup>-2</sup>); *A*<sub>(BET)</sub> is the BET surface area (m<sup>2</sup>/g).

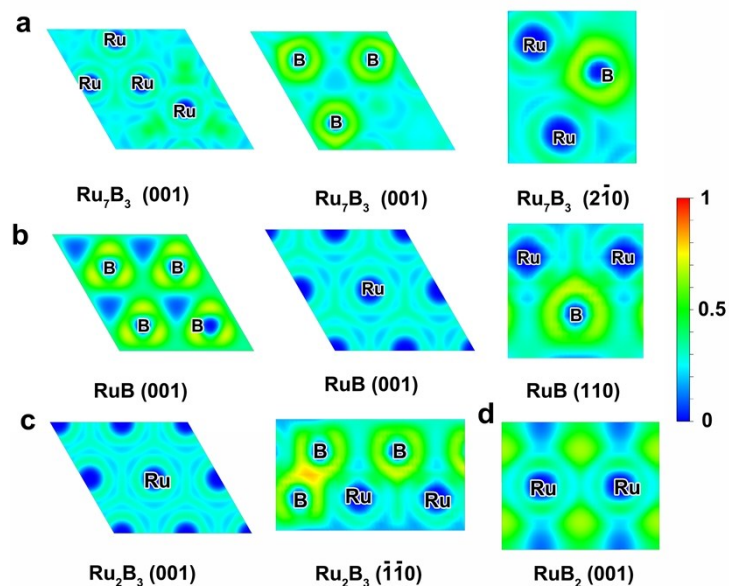

**Fig. S1.** Electron location function (ELF) of different planes for (a)  $\text{Ru}_7\text{B}_3$ , (b)  $\text{RuB}$ , (c)  $\text{Ru}_2\text{B}_3$ , (d)  $\text{RuB}_2$ .

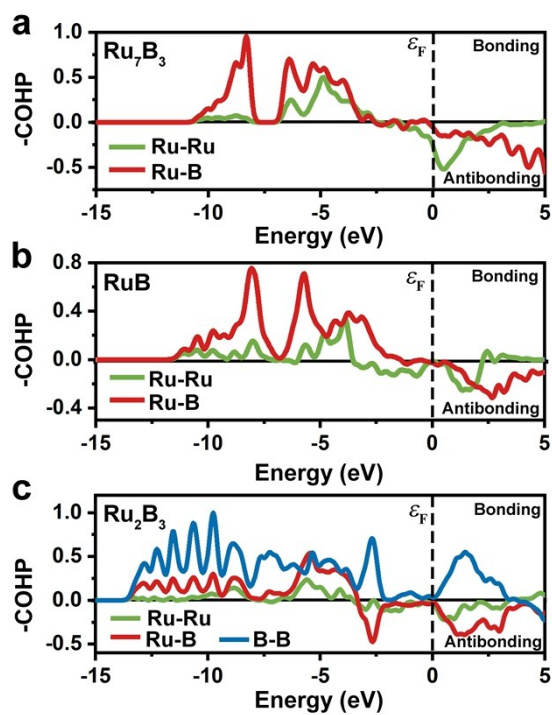

**Fig. S2.** Crystal Orbital Hamilton Populations (COHP) curves of (a)  $\text{Ru}_7\text{B}_3$ , (b)  $\text{RuB}$ , (c)  $\text{Ru}_2\text{B}_3$ .

**Table S1.** The integrated COHP (-ICOHP) of Ru<sub>7</sub>B<sub>3</sub>, Ru<sub>2</sub>B<sub>3</sub>, RuB and RuB<sub>2</sub> for different interactions.

|                                | Ru-B (eV) | B-B(eV) | Ru <i>d</i> -B <i>sp</i> (eV) |
|--------------------------------|-----------|---------|-------------------------------|
| Ru <sub>7</sub> B <sub>3</sub> | 2.85      | --      | 1.93                          |
| RuB                            | 2.80      | --      | 1.95                          |
| Ru <sub>2</sub> B <sub>3</sub> | 2.37      | 5.05    | 1.75                          |
| RuB <sub>2</sub>               | 2.21      | 5.31    | 1.64                          |

**Table S2.** The formation energy of different ruthenium-boron intermetallics.

| Formation energy (eV/atom)     |        |
|--------------------------------|--------|
| Ru <sub>7</sub> B <sub>3</sub> | -0.138 |
| RuB                            | -0.331 |
| Ru <sub>2</sub> B <sub>3</sub> | -0.332 |
| RuB <sub>2</sub>               | -0.286 |

**Table S3.** The experimental parameters for the synthesis of ruthenium-boron intermetallics.

| Sample Name                    | K <sub>2</sub> RuCl <sub>5</sub> | MgB <sub>2</sub> | Mg         | Temperature and Time |
|--------------------------------|----------------------------------|------------------|------------|----------------------|
| Ru <sub>7</sub> B <sub>3</sub> | 0.2 mmol                         | 0.13 mmol        | 0.123 mmol | 950 °C, 5 h          |
| RuB                            | 0.15mmol                         | 0.1 mmol         | 0.15mmol   | 800 °C, 9 h          |
| Ru <sub>2</sub> B <sub>3</sub> | 0.15 mmol                        | 0.5 mmol         | --         | 700 °C, 5 h          |
| RuB <sub>2</sub>               | 0.167mmol                        | 0.5 mmol         | --         | 950 °C, 3 h          |

**Table S4.** The BET surface areas of different ruthenium-boron intermetallics.

| BET Surface Area (m <sup>2</sup> /g) |      |
|--------------------------------------|------|
| Ru <sub>7</sub> B <sub>3</sub>       | 1.4  |
| RuB                                  | 3.6  |
| Ru <sub>2</sub> B <sub>3</sub>       | 12.3 |
| RuB <sub>2</sub>                     | 12.5 |

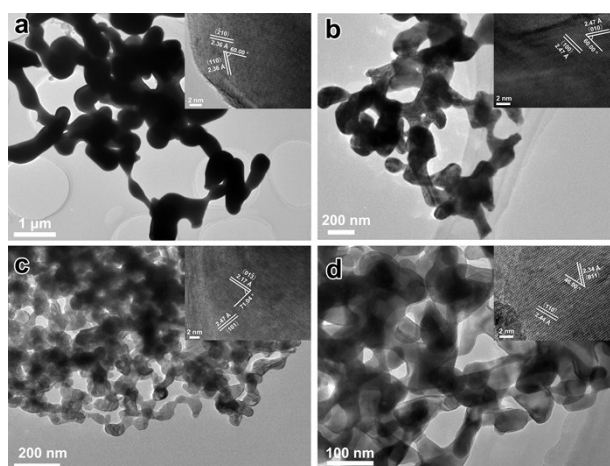

**Fig. S3.** TEM and HR-TEM (inset) images of four ruthenium-boron intermetallics (a)  $\text{Ru}_7\text{B}_3$ , (b)  $\text{RuB}$ , (c)  $\text{Ru}_2\text{B}_3$ , (d)  $\text{RuB}_2$

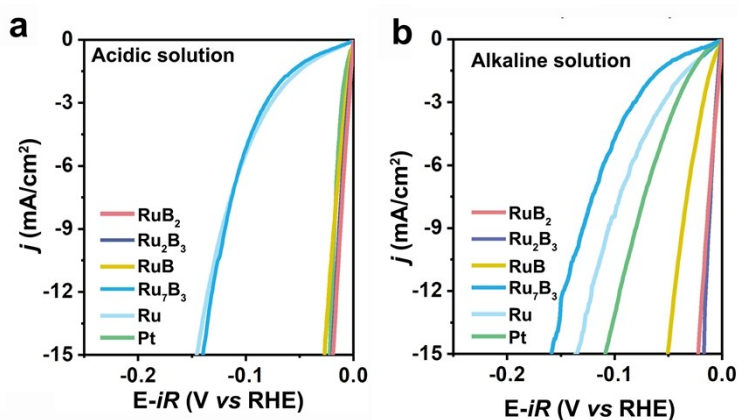

**Fig. S4.** Polarization curves of  $\text{Ru}_7\text{B}_3$ ,  $\text{RuB}$ ,  $\text{Ru}_2\text{B}_3$ ,  $\text{RuB}_2$ , metallic  $\text{Ru}$  and  $\text{Pt}$  for the HER with 85%  $iR$ -compensation. (a) 0.5 M  $\text{H}_2\text{SO}_4$  solution. (b) 1 M  $\text{KOH}$  solution.

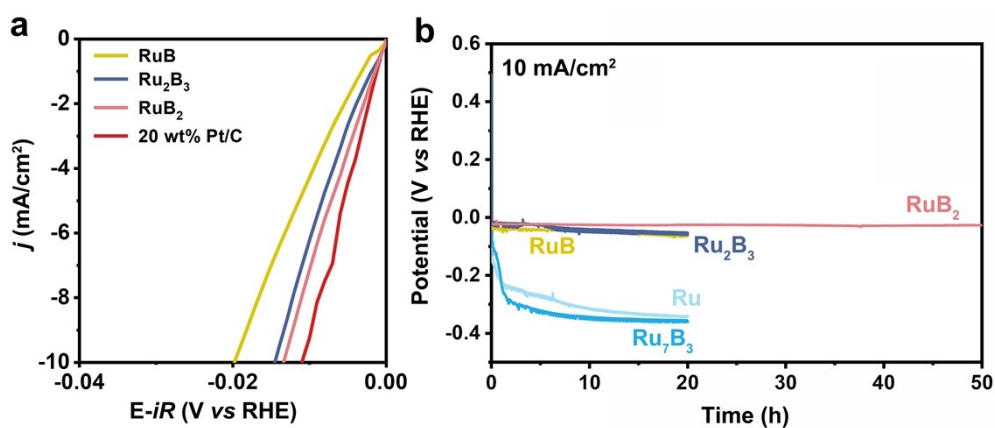

**Fig. S5.** (a) Polarization curves of  $\text{RuB}$ ,  $\text{Ru}_2\text{B}_3$ ,  $\text{RuB}_2$  and commercial 20 wt%  $\text{Pt/C}$  for HER in 0.5 M  $\text{H}_2\text{SO}_4$  solution with 85%  $iR$ -compensation. (b) Chronopotentiometric curve of  $\text{Ru}_7\text{B}_3$ ,  $\text{RuB}$ ,  $\text{Ru}_2\text{B}_3$ ,  $\text{RuB}_2$  and metallic  $\text{Ru}$  in 0.5 M  $\text{H}_2\text{SO}_4$  solution at  $10 \text{ mA/cm}_{\text{goe}}^2$ .

**Table S5.** Tafel slop of different ruthenium-boron intermetallics.

|                                | 0.5 M H <sub>2</sub> SO <sub>4</sub> (mV/dec) | 1.0 M KOH (mV/dec) |
|--------------------------------|-----------------------------------------------|--------------------|
| Ru <sub>7</sub> B <sub>3</sub> | 71.9                                          | 73.3               |
| RuB                            | 32.7                                          | 30.6               |
| Ru <sub>2</sub> B <sub>3</sub> | 30.3                                          | 27.3               |
| RuB <sub>2</sub>               | 30.2                                          | 27.9               |
| Pt                             | 26.1                                          | 52.5               |
| Ru                             | 61.6                                          | 73.3               |

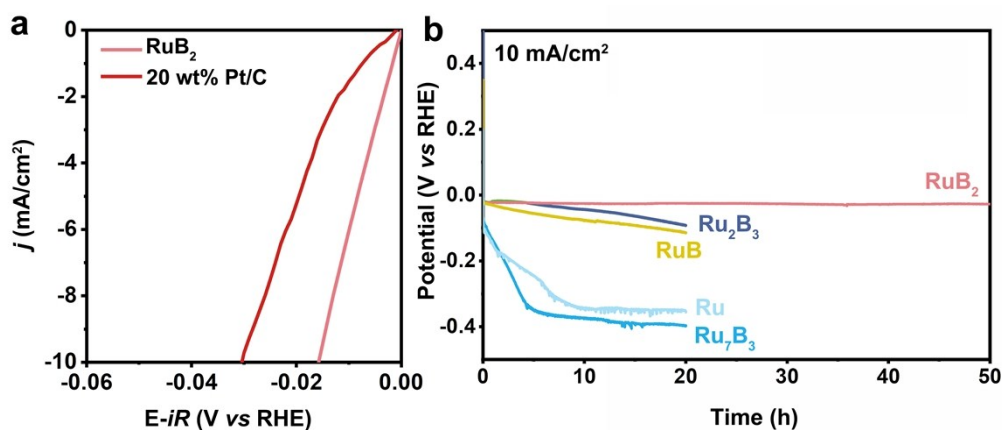**Fig. S6.** (a) Polarization curves of RuB<sub>2</sub> and commercial 20 wt% Pt/C for the HER in 1.0 M KOH solution with 85%  $iR$ -compensation. (b) Chronopotentiometric curve of Ru<sub>7</sub>B<sub>3</sub>, RuB, Ru<sub>2</sub>B<sub>3</sub>, RuB<sub>2</sub> and metallic Ru in 1.0 M KOH solution at 10 mA/cm<sub>goe</sub><sup>2</sup>.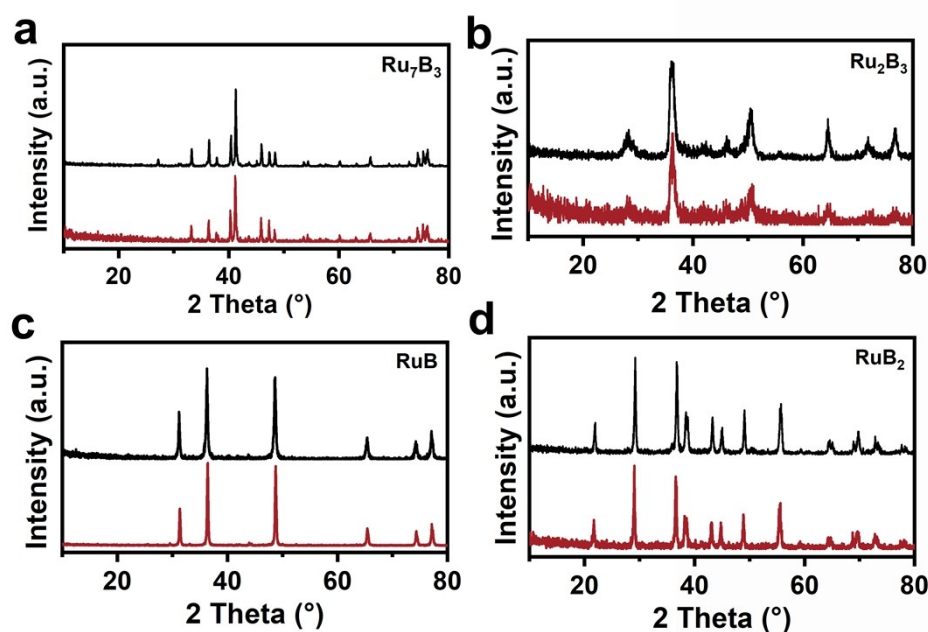**Fig. S7.** The XRD patterns of the four ruthenium-boron intermetallics. Black line is before catalysis, red line is after 10 h chronopotentiometric test. (a)Ru<sub>7</sub>B<sub>3</sub>. (b)Ru<sub>2</sub>B<sub>3</sub>. (c)RuB. (d)RuB<sub>2</sub>.



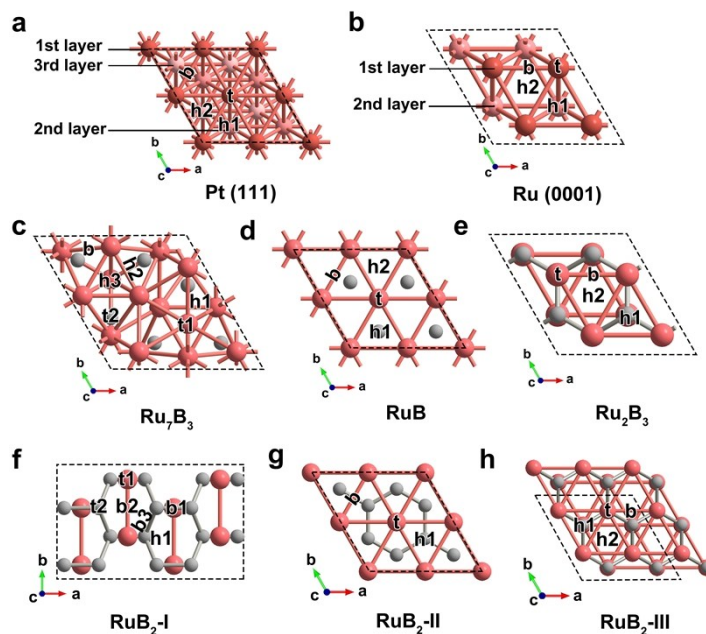

**Fig. S8.** The adsorption  $H^*$  sites for (a) Pt (111) (b) Ru (0001) (c)  $Ru_7B_3$  (001) (d) RuB (001) (e)  $Ru_2B_3$  (001) (f)  $RuB_2$ -I (001) (g)  $RuB_2$ -II (001) and (h)  $RuB_2$ -III (001) surfaces with metal-termination.

**Table S6.** The  $\Delta E_{H^*}$  of  $RuB_2$ -I at different sites. The t, b and h denote the Top, Bridge and Hollow sites, respectively. The bolded values are  $\Delta E_{H^*}$  in the most stable adsorption sites.

|            | <b>t1 (eV)</b> | <b>t2 (eV)</b> | <b>b1 (eV)</b> | <b>b2 (eV)</b> | <b>b3 (eV)</b> | <b>h1 (eV)</b> |
|------------|----------------|----------------|----------------|----------------|----------------|----------------|
| $RuB_2$ -I | -0.06          | Unstable       | -0.32          | <b>-0.34</b>   | Unstable       | -0.16          |

**Table S7.** The  $\Delta E_{H^*}$  of  $RuB_2$ -II and  $RuB_2$ -III at different sites. The bolded values are  $\Delta E_{H^*}$  in the most stable adsorption sites.

|              | <b>Top(eV)</b> | <b>Bridge(eV)</b> | <b>h1(eV)</b> | <b>h2(eV)</b> |
|--------------|----------------|-------------------|---------------|---------------|
| $RuB_2$ -II  | Unstable       | Unstable          | <b>-1.91</b>  | /             |
| $RuB_2$ -III | -0.61          | Unstable          | -0.80         | <b>-1.00</b>  |

**Table S8.** The  $\Delta E_{H^*}$  of  $Ru_7B_3$  at different sites. The t, b and h denote the Top, Bridge and Hollow sites, respectively. The bolded values are  $\Delta E_{H^*}$  in the most stable adsorption sites.

|           | <b>t1(eV)</b> | <b>t2(eV)</b> | <b>b(eV)</b> | <b>h1(eV)</b> | <b>h2(eV)</b> | <b>h3(eV)</b> |
|-----------|---------------|---------------|--------------|---------------|---------------|---------------|
| $Ru_7B_3$ | -0.63         | -0.27         | <b>-0.64</b> | -0.63         | 0.01          | 0.08          |

**Table S9.** The  $\Delta E_{H^*}$  of Pt (111), Ru (0001), RuB and Ru<sub>2</sub>B<sub>3</sub> at different sites. The bolded values are  $\Delta E_{H^*}$  in the most stable adsorption sites. Ru<sub>2</sub>B<sub>3</sub> ( I ) and ( II ) are Ru layers bond to isolated boron atoms and puckered boron layers, respectively.

|                                       | <b>Top(eV)</b> | <b>Bridge(eV)</b> | <b>h1(eV)</b> | <b>h2(eV)</b> |
|---------------------------------------|----------------|-------------------|---------------|---------------|
| RuB                                   | -0.26          | Unstable          | -0.48         | <b>-0.59</b>  |
| Ru <sub>2</sub> B <sub>3</sub> ( I )  | -0.26          | Unstable          | -0.35         | <b>-0.49</b>  |
| Ru <sub>2</sub> B <sub>3</sub> ( II ) | -0.57          | Unstable          | -0.71         | <b>-0.88</b>  |
| Pt (111)                              | <b>-0.57</b>   | -0.52             | -0.49         | -0.54         |
| Ru (0001)                             | -0.24          | Unstable          | -0.65         | <b>-0.68</b>  |

**Table S10.** The  $\Delta G_{H^*}$  of the most stable adsorption sites for different materials. The bold values are  $\Delta G_{H^*}$  obtained at 100 % H\* coverage on the most stable adsorption sites. Ru<sub>2</sub>B<sub>3</sub> ( I ) and ( II ) are Ru layers bond to isolated boron atoms and puckered boron layers, respectively.

|                                       | $\Delta G_{H^*}/\text{eV}$ |
|---------------------------------------|----------------------------|
| Ru <sub>7</sub> B <sub>3</sub>        | -0.42                      |
| RuB                                   | <b>-0.23</b>               |
| Ru <sub>2</sub> B <sub>3</sub> ( I )  | <b>-0.17</b>               |
| Ru <sub>2</sub> B <sub>3</sub> ( II ) | <b>-0.17</b>               |
| RuB <sub>2</sub> -I                   | <b>-0.04</b>               |
| RuB <sub>2</sub> -II                  | -1.71                      |
| RuB <sub>2</sub> -III                 | -0.79                      |
| Pt (111)                              | <b>-0.10</b>               |
| Ru (0001)                             | <b>-0.38</b>               |

**Table S11.** The integrated COHP (-ICOHP) of Ru-H for different RuB<sub>2</sub>.

|                       | -ICOHP (eV) | Adsorption site | -ICOHP/unit cell (eV) |
|-----------------------|-------------|-----------------|-----------------------|
| RuB <sub>2</sub> - I  | 1.72        | bridge          | 3.44                  |
| RuB <sub>2</sub> -II  | 1.44        | 3-fold hollow   | 4.32                  |
| RuB <sub>2</sub> -III | 1.40        | 3-fold hollow   | 4.20                  |

## Supplementary References

1. G. Kresse and J. Furthmüller, *Comput. Mater. Sci.*, 1996, **6**, 15.
2. G. Kresse and J. Furthmüller, *Phys. Rev. B*, 1996, **54**, 11169.
3. J. P. Perdew, K. Burke and M. Ernzerhof, *Phys. Rev. Lett.*, 1996, **77**, 3865.
4. P. E. Blöchl, *Phys. Rev. B*, 1994, **50**, 17953.
5. H. J. Monkhorst and J. D. Pack, *Phys. Rev. B*, 1976, **13**, 5188.
6. S. J. Grimme, *Comp. Chem.*, 2006, **27**, 1787.
7. R. Dronskowski and P. E. Blöchl, *J. Phys. Chem.*, 1993, **97**, 8617.
8. V. L. Deringer, A. L. Tchougreeff and R. Dronskowski, *J. Phys. Chem. A*, 2011, **115**, 5461.
9. S. Maintz, V. L. Deringer, A. L. Tchougreeff and R. Dronskowski, *J. Comput. Chem.*, 2013, **34**, 2557.
10. S. Maintz, V. L. Deringer, A. L. Tchougreeff and R. Dronskowski, *J. Comput. Chem.*, 2016, **37**, 1030.
11. J. K. Nørskov, T. Bligaard, A. Logadottir, J. R. Kitchin, J. Chen, S. Pandelov and U. Stimming, *J. Electrochem. Soc.*, 2005, **152**, 23.
12. Q. Li, X. Zou, X. Ai, H. Chen, L. Sun and X. Zou, *Adv. Energy Mater.*, 2018, 1803369.
13. M. S. Burke, M. G. Kast, L. Trotochaud, A. M. Smith and S. W. Boettcher, *J. Am. Chem. Soc.*, 2015, **137**, 3638.
